# Supplementary material for: An analysis of instabilities and limit cycles in glacier-dammed reservoirs
Source: Copernicus journal article supplement (doi:10.5194/tc-2019-138), 2019-07-15
Supplement: Supplementary file 1 [file tc-2019-138-supplement.zip]

Archive with 3 entries (3 files):
- Schoof_outburst_floods_supplementary.pdf
- extended_model.zip
- lumped_model.zip
